# Supplementary material
Source: PubMed Central journal article supplement (PMC5776825)
Supplement: pnas.201717194SI.pdf [file pnas.201717194SI.pdf]

# Supporting Information

Radl et al. 10.1073/pnas.1717194115

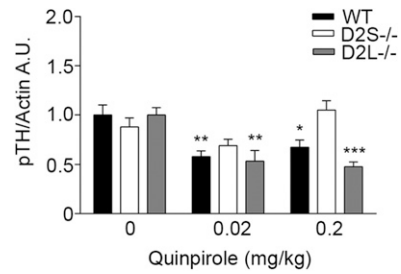

**Fig. S1.** TH phosphorylation levels upon quinpirole challenge. Quantifications of Western blot analyses of TH phosphorylation on Ser40 in protein extracts from the ventral striatum (VS) of WT, D2S<sup>-/-</sup>, and D2L<sup>-/-</sup> mice injected with saline and 0.02 and 0.2 mg/kg of quinpirole. Two-way ANOVA, genotype × treatment:  $F_{(4, 30)} = 3.399$ ;  $P = 0.0209$   $n = 3-5$  samples/treatment per genotype. \* $P < 0.05$ , \*\* $P < 0.01$ , \*\*\* $P < 0.001$  vs. saline-treated mice.
